# Supplementary material
Source: PubMed Central journal article supplement (PMC4198488)

**Fig. S1**

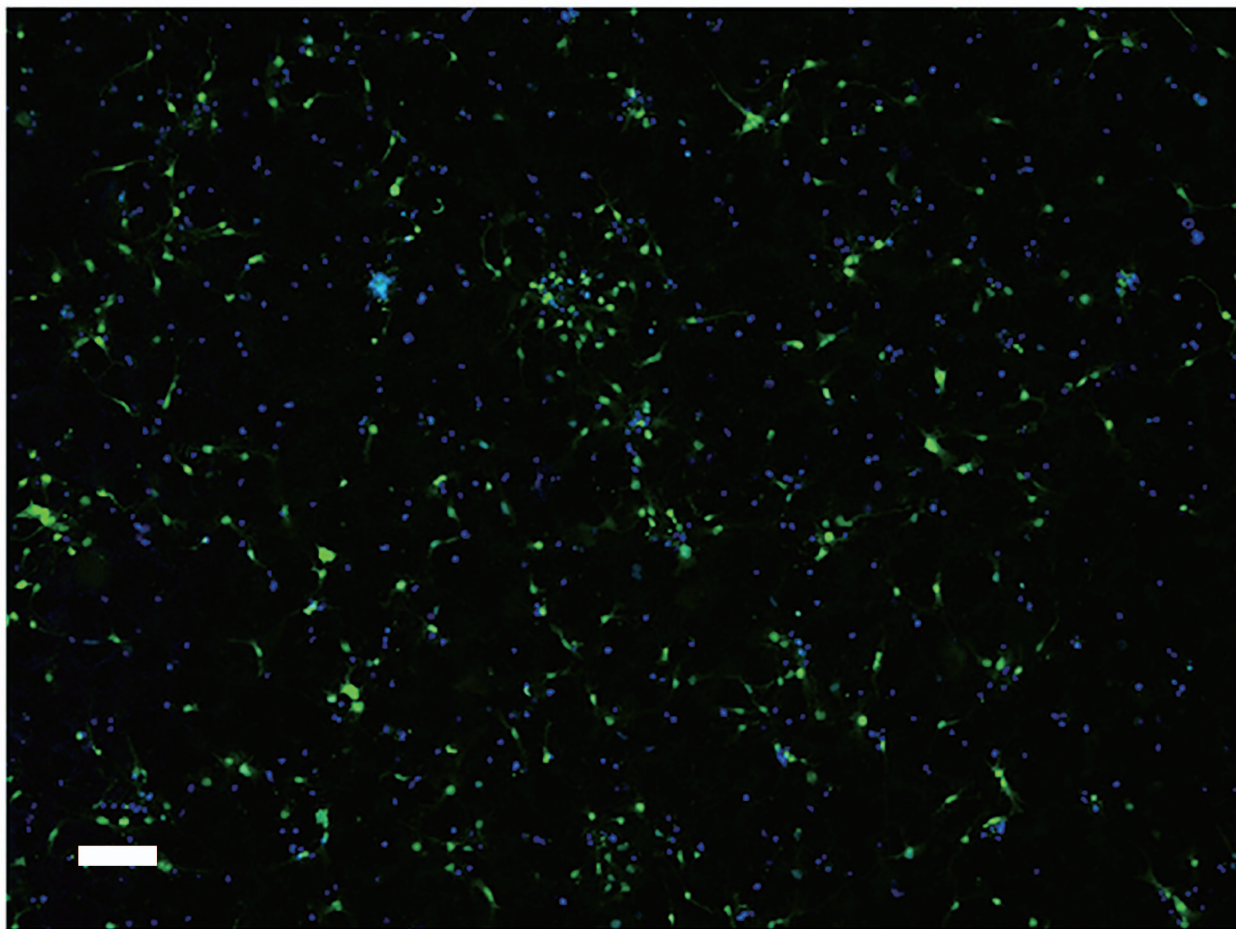

**GFP**

**DAPI**

Fig. S2

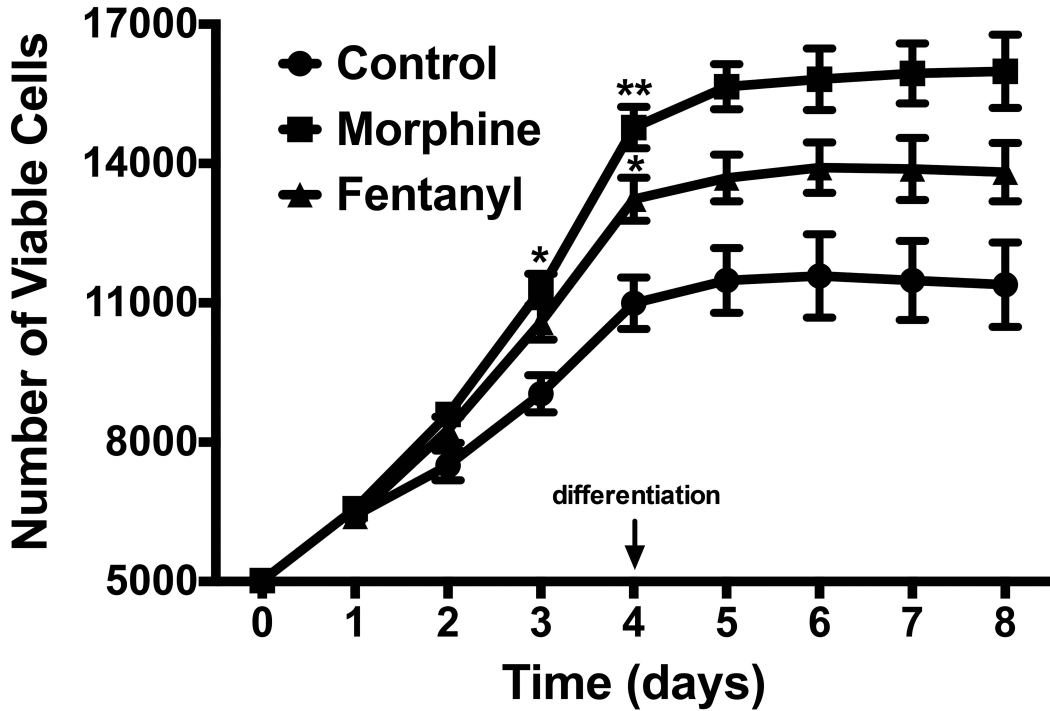

Fig. S3

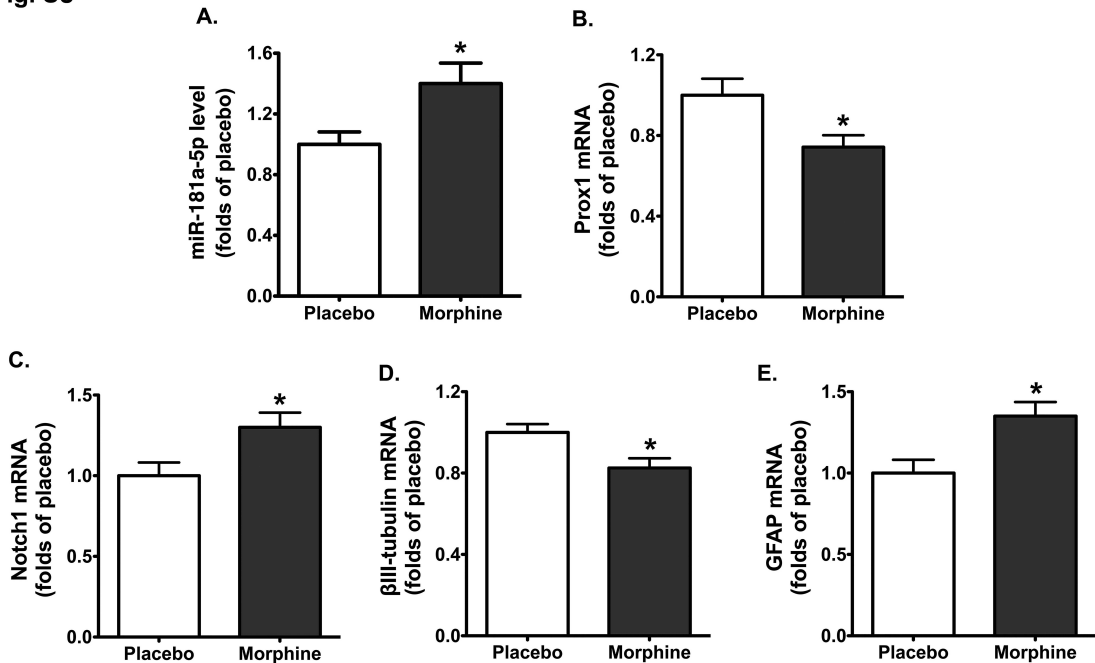

Supplement: NIHMS608804-supplement-Supp_FigureS1-S3.pdf [file NIHMS608804-supplement-Supp_FigureS1-S3.pdf]
